# Supplementary material for: Soybean MADS-box gene GmAGL1 promotes flowering via the photoperiod pathway
Source: PubMed Central journal article supplement (PMC5769455; doi:10.1186/s12864-017-4402-2), 2018-01-16
Supplement: 12864_2017_4402_MOESM1_ESM.pdf [file 12864_2017_4402_MOESM1_ESM.pdf]

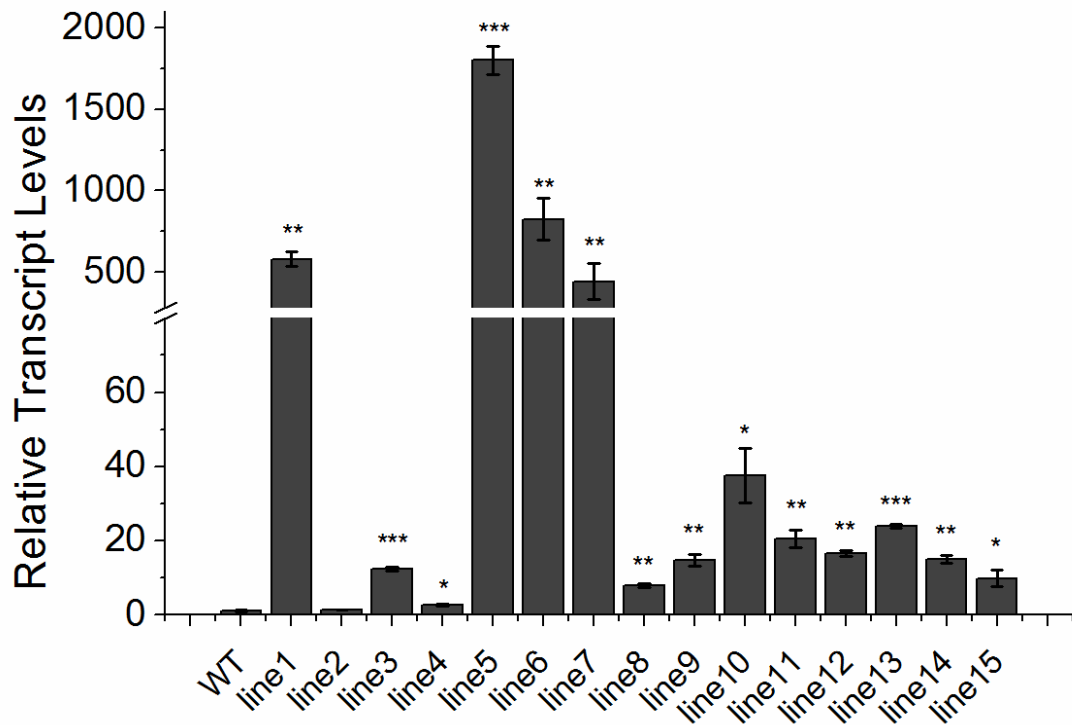

**Supporting Fig. 1 Relative *GmAGL1* expression in the leaves of the transgenic lines**

T1 generations of 15 transgenic lines and WT were cultured in soil. RNA was extracted from the leaves of 20-day-old seedlings. *GmAGL1* transcript levels were determined by qRT-PCR. The amplification of *α-Tubulin* gene was used as an internal control to normalize all the data. Transcript levels were calculated using the formula  $2^{-\Delta\Delta C_t}$  for the expression levels relative to *GmAGL1*. Leaves of WT was used as control (Relative expression is 1) to compare the relative expression of other samples. Data represent means of three biological replicates with error bars indicating SD. Asterisks indicate a significant difference between the control and treated samples (\*P < 0.05, \*\*P < 0.01, \*\*\*P < 0.001).

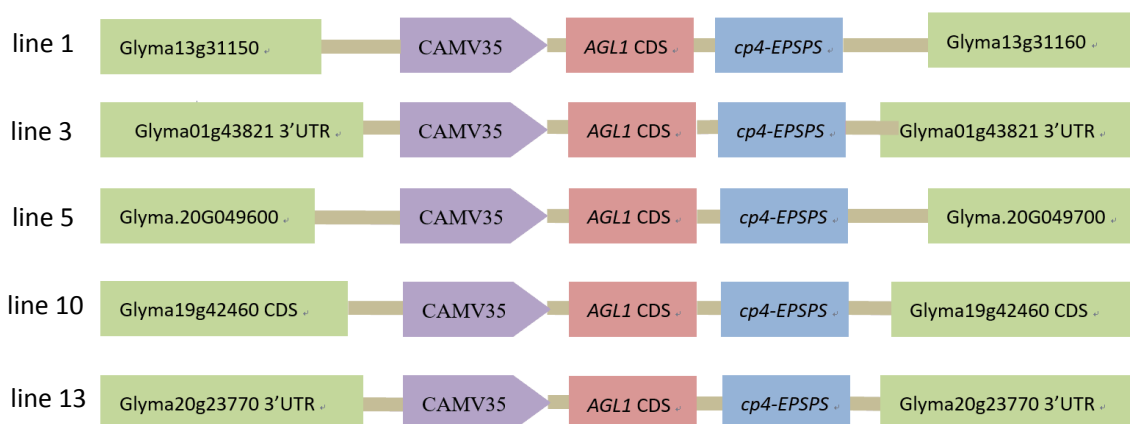

**Supporting Fig. 2 Transgene integration sites in the five homozygous transgenic lines**

Transgene insert sequence (containing a CaMV35S promoter, the *GmAGL1* CDS and the resistance gene *cp4-EPSPS*) is about 2300bp. All the sequencing sequences obtained were blasted on the phytozome server and the soybase server to determine the insertion position. In transgenic line 1, the transgene insert sequence inserted into the long non-coding region between Glyma13g31150 and Glyma13g31160. In transgenic line 3, the transgene insert sequence inserted into the 3'UTR of a Myb-like DNA-binding domain Glyma01g438213. In transgenic line 5, the transgene insert sequence inserted into the long non-coding region between Glyma.20G049600 and Glyma.20G049700, and these two gene models are present only in the current Wm82.a2 assembly, annotation version 1 set. In transgenic line 10, the transgene insert sequence inserted into the CDS of a Histone-like transcription factor (CBF/NF-Y) and archaeal histone Glyma19g42460. In transgenic line 13, the transgene insert sequence inserted into the 3'UTR of Glyma20g23770 which is a PF01535 - PPR repeat.

Supporting Fig. 3 Flowers of *GmAGL1* over expression line 6 and line7 in filed

line 6

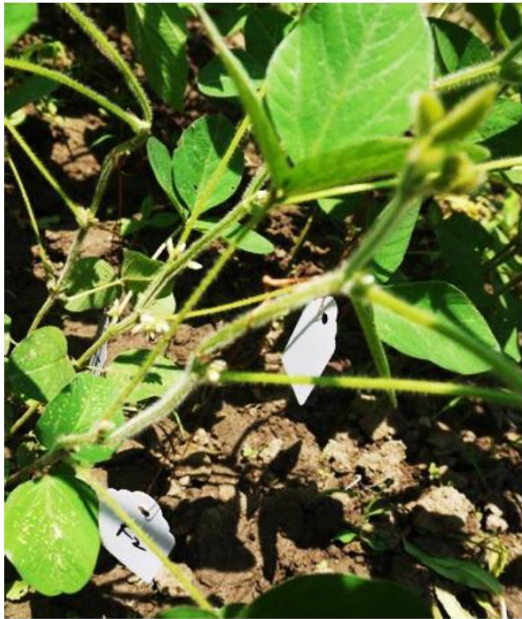

line 7

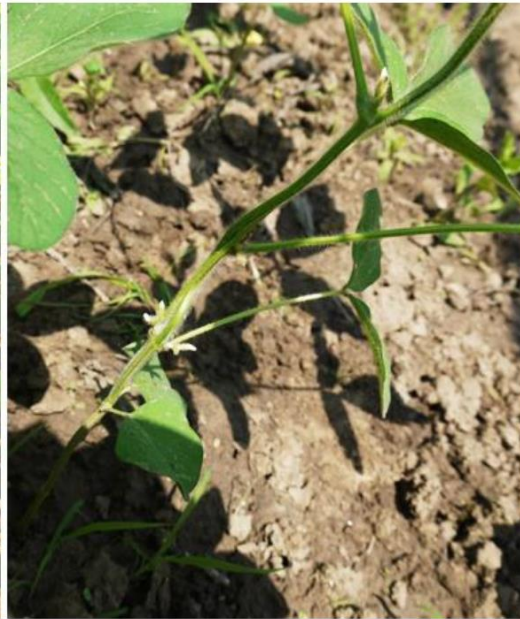

line 8

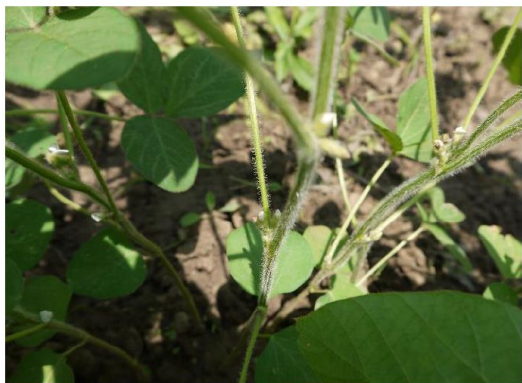

line 9

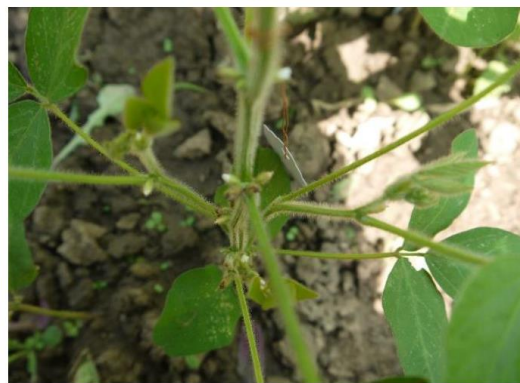

line 11

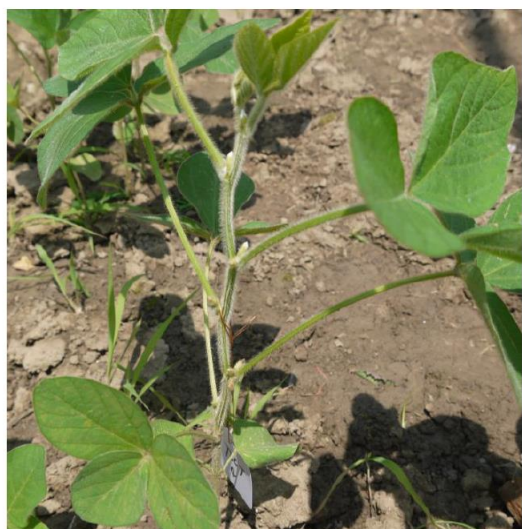

line 13

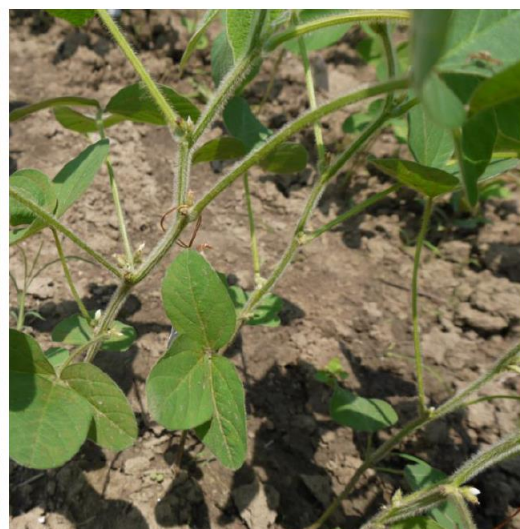

Supporting Fig. 4 The pathway of over expression *GmAGL1* promote flowering in soybean

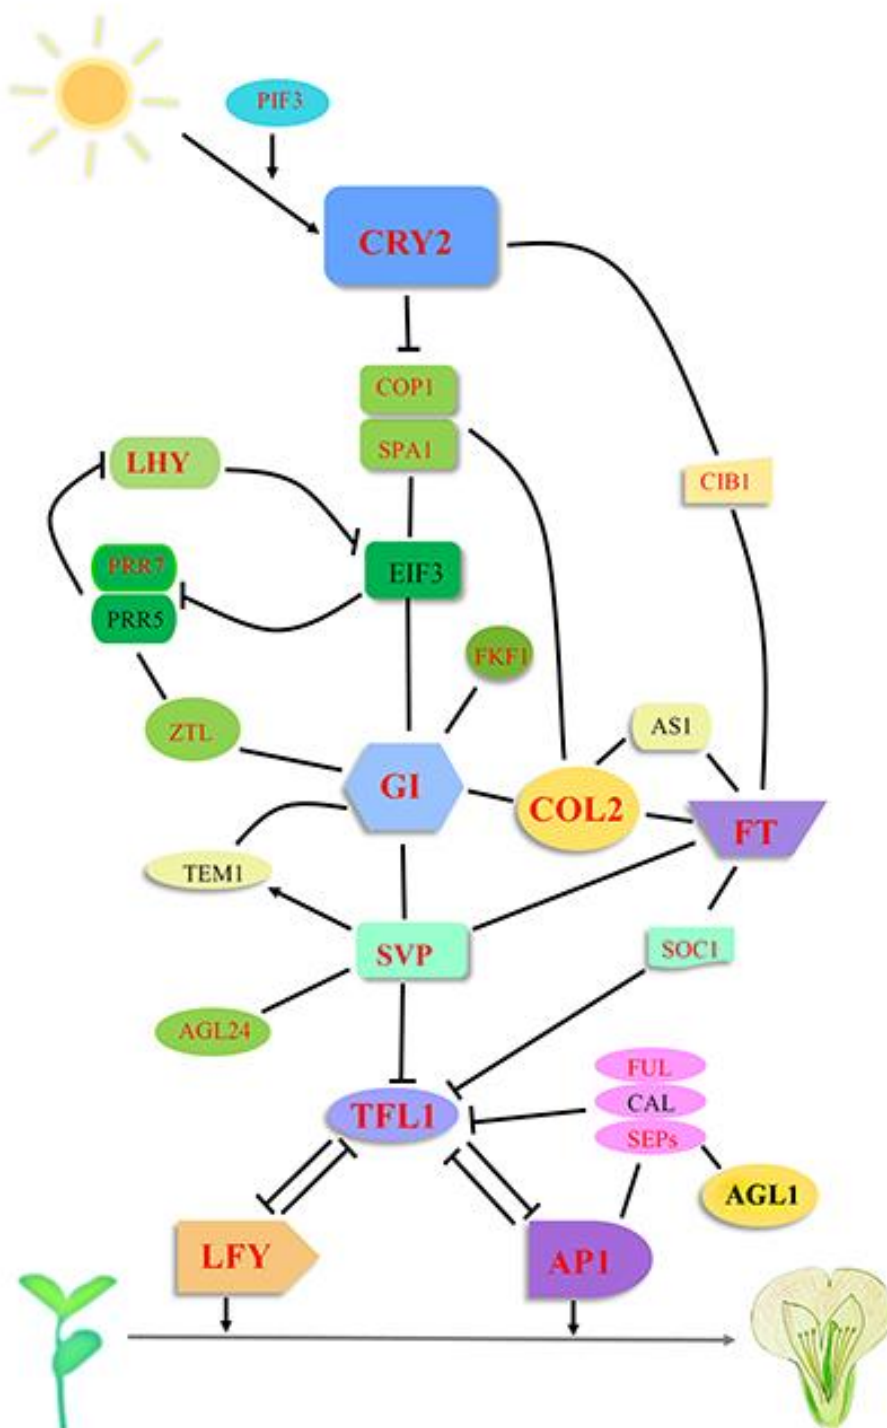

Arrows indicate a promoting, T-ends indicate an inhibiting genetic interaction. straight line indicate an interaction without a known direction. The red font indicates that the genes had already been identified or functional studies in soybean. Black font indicates that the genes were Arabidopsis or other plants homologous genes which had not been identified or functional studies in soybean yet.



Supporting Fig.5 Detailed diagram of vector pmG610021 including *GmAGL1*.

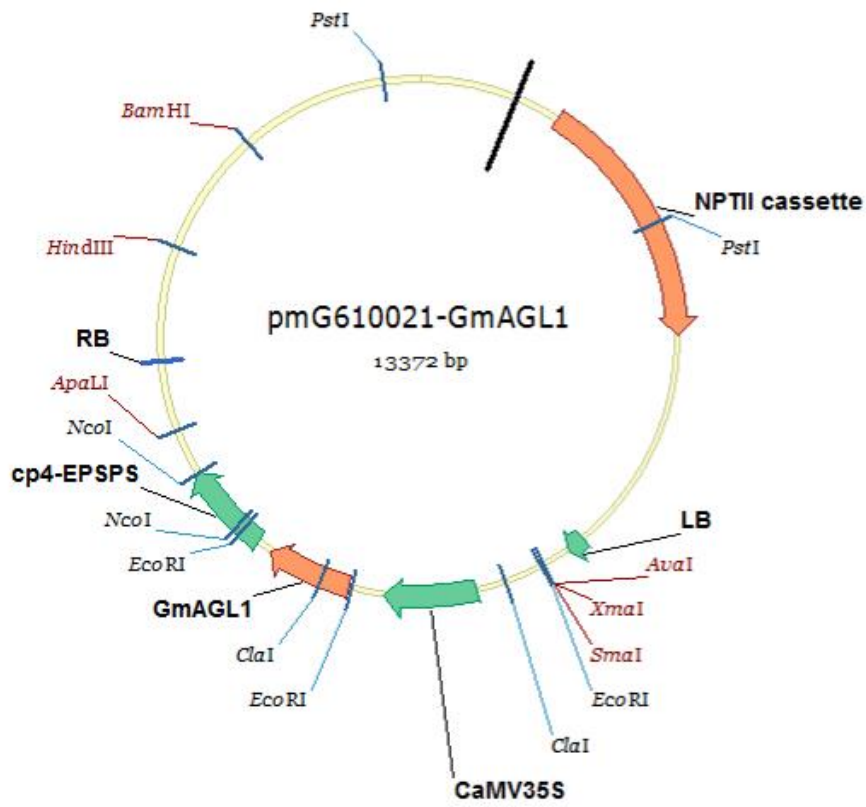

**Supporting Table 1. Primer sequences used in transgenic detected**

| Name    | Sequence                          | Used                              |
|---------|-----------------------------------|-----------------------------------|
| AGL1-R  | TCAGCAGGAAGCGTCCAAAT              | <i>GmAGL1</i> expression          |
| AGL1-F  | TAATCATCGCAAGACCGGCA              | <i>GmAGL1</i> expression          |
| EPS-R   | CCTTCGCANGACCCTTCCTCTATA          | <i>cp4-EPSPS</i> Taq-Man          |
| EPS-F   | ATCCTGGCGCCCATGGCCTGCATG          | <i>cp4-EPSPS</i> Taq-Man          |
| EPS-P   | TGCCGGTCTTGCGATGATT               | <i>cp4-EPSPS</i> Taq-Man Probe    |
| TR1     | ACAGTGTTAGAGGAACGATCGATAGG        | Tail-PCR Right-specific primer1   |
| TR2     | GCTCTCTGAGTCTGAAGGAATTAAGAACCCTGG | Tail-PCR Right-specific primer2   |
| TR3     | TGCGAGTCAACCATACCTCCACAATC        | Tail-PCR Right-specific primer3   |
| TL1     | CAGACTCAGAGAGCTAAGAGCTTCAC        | Tail-PCR Left-specific primer 1   |
| TL2     | CTATCGATCGTTCCTCTAACACTGTTGTTGGCA | Tail-PCR Left-specific primer2    |
| TL3     | CTTCTGTGAACACCCTTCTGGTATTGCTTCG   | Tail-PCR Left-specific primer3    |
| E1-R    | TCCAACATGAGCAACCCTTCA             | <i>GmAGL1</i> expression          |
| E1-F    | AGGCTTCGCATATGGTGGATT             | <i>GmAGL1</i> expression          |
| G1a-R   | AGCTTGCTTCACGCCTACTT              | <i>E2 gene GmG1a</i> expression   |
| G1a-F   | CTCTTGCCCTCTTGCTTCCA              | <i>E2 gene GmG1a</i> expression   |
| PhyA3-R | GTGAGCCCCTAGGCATTGTT              | <i>E3 gene GmPhyA3</i> expression |
| PhyA3-F | CCCTAATCGCCACACCTTGT              | <i>E3 gene GmPhyA3</i> expression |
| PhyA2-R | TGAGCCAGTCAAGCCGTATG              | <i>E4 gene GmPhyA2</i> expression |
| PhyA2-F | GCTCCCACTAGGCAACGATT              | <i>E4 gene GmPhyA2</i> expression |
| FT2a-R  | ACCGTGTATGCACCAGGATG              | <i>E7 gene GmFT2a</i> expression  |
| FT2a-F  | CAGCAACTGGCAATCCAAGG              | <i>E7 gene GmFT2a</i> expression  |
| FT5a-R  | GGGCGATTAGCAATGGCTTG              | <i>E8 gene GmFT5a</i> expression  |
| FT5a-F  | GTTGCTAGGGCTAGGTGCAT              | <i>E8 gene GmFT5a</i> expression  |

**Supporting Table 2. Taq-Man assay results of transgenic plants in T1 generation**

| Plant ID | Copy level | Plant ID | Copy level | Plant ID | Copy level |
|----------|------------|----------|------------|----------|------------|
| line1-2  | Low        | line5-8  | Med        | line9-6  | Low        |
| line1-4  | Low        | line5-9  | Med        | line10-2 | Med        |
| line1-7  | Med        | line6-1  | Low        | line10-7 | Med        |
| line2-3  | Low        | line6-2  | Low        | line10-9 | Low        |
| line2-6  | Low        | line6-6  | Low        | line11-2 | Low        |
| line2-8  | Low        | line7-1  | Low        | line11-3 | Low        |
| line3-1  | Med        | line7-2  | Low        | line12-1 | Low        |
| line3-3  | Low        | line7-4  | Low        | line12-2 | Low        |
| line3-4  | Low        | line8-2  | Low        | line13-1 | Low        |
| line4-1  | Low        | line8-4  | Low        | line14-1 | Low        |
| line4-5  | Low        | line8-6  | Low        | line15-1 | High       |
| line4-6  | Low        | line9-3  | Med        | WT1      | 0          |
| line5-2  | Low        | line9-5  | Low        | WT2      | 0          |

Copy level Low indicate a single copy insert; copy level Med indicate a double copy insert; copy level High indicate multiple copies of the insert; WT is the negative control copy level is 0.

**Supporting Table 3. Transcripts of all the detected MADS-box gene**

| GENE ID       | At                   | VC      |         | V4      |         | R1      |         |
|---------------|----------------------|---------|---------|---------|---------|---------|---------|
|               | Ortholog             | log2FC  | P value | log2FC  | P value | log2FC  | P value |
| Glyma01G02525 | AGL21                | -2.1229 | 0.1340  | -3.5453 | 0.0035  | -1.1314 | 0.3540  |
| Glyma01G02880 | AGL22, SVP           | -0.2397 | 0.0235  | -0.0034 | 1.0000  | 0.2346  | 0.1521  |
| Glyma01G08130 | AGL2, SEP1           | Inf     | 0.9928  | 0.2002  | 0.6478  | -0.1142 | 0.5819  |
| Glyma01G08150 | AGL2, SEP1           | 0.1243  | 1.0000  | 0.3796  | 0.0296  | -0.4258 | 0.0433  |
| Glyma01G37470 | AP3, ATAP3           | 0.7440  | 0.2981  | 0.3229  | 0.1248  | -0.3662 | 0.0207  |
| Glyma02G04710 | AGL22, SVP           | -0.5969 | 0.0000  | -0.1588 | 0.1406  | -0.0135 | 0.9464  |
| Glyma02G13401 | AGL2, SEP1           | 4.2327  | 0.0048  | 0.3274  | 0.1977  | 0.0661  | 0.7313  |
| Glyma02G13420 | AGL7, AP1            | -0.5292 | 1.0000  | 0.2348  | 0.1954  | -0.2578 | 0.0663  |
| Glyma02G30990 | AGL62                | 0.8825  | 0.5755  | -0.4786 | 0.6907  | -0.8637 | 0.4595  |
| Glyma02G33040 | AGL18                | -0.9533 | 0.0999  | 0.2809  | 0.3500  | 0.0625  | 0.7997  |
| Glyma02G35080 | AGL62                | Inf     | 0.6811  | NA      | NA      | Inf     | 0.9911  |
| Glyma02G38091 | AGL16                | -0.0613 | 0.9692  | -0.3574 | 0.6132  | 0.4307  | 0.3954  |
| Glyma02G45730 | AGL5, SHP2           | -0.2152 | 1.0000  | 0.5180  | 0.4814  | -0.5328 | 0.2371  |
| Glyma03G02191 | AGL20, SOC1          | 0.7302  | 0.6911  | -0.1736 | 0.2276  | -0.1096 | 0.4225  |
| Glyma03G02210 | AGL6                 | -Inf    | 1.0000  | -0.1821 | 0.5709  | -0.7512 | 0.0000  |
| Glyma03G19880 | AGL80,<br>FEM111     | 0.4672  | 0.7387  | -0.8398 | 0.1983  | -1.0581 | 0.2596  |
| Glyma03G26261 | AP3, ATAP3           | NA      | NA      | Inf     | 1.0000  | Inf     | 0.9911  |
| Glyma04G02980 | AP3, ATAP3           | -0.7315 | 0.7218  | 0.4822  | 0.4656  | -0.1836 | 0.2381  |
| Glyma04G04641 | AGL66                | NA      | NA      | 1.1905  | 0.5530  | -2.0699 | 0.0093  |
| Glyma04G31847 | AGL8, FUL            | 0.0222  | 1.0000  | 0.2481  | 0.2494  | -0.0621 | 0.6684  |
| Glyma04G42420 | PI                   | NA      | NA      | 0.2137  | 0.4619  | -0.0450 | 0.8123  |
| Glyma04G43640 | AGL11, STK           | 0.4989  | 0.7304  | 1.1913  | 0.4848  | -0.5884 | 0.3356  |
| Glyma05G00960 | AGL65                | Inf     | 0.9928  | -0.7611 | 0.8230  | -0.3070 | 1.0000  |
| Glyma05G03660 | AGL19, GL19          | -1.8488 | 0.0013  | -0.3764 | 0.0014  | -0.1820 | 0.2584  |
| Glyma05G07286 | AGL3, SEP4           | -Inf    | 0.7023  | 0.3957  | 0.2305  | -0.3390 | 0.0727  |
| Glyma05G07380 | AGL8, FUL            | -0.7191 | 0.5773  | 0.1949  | 0.0793  | -0.1666 | 0.4319  |
| Glyma05G28130 | AGL70, FCL3,<br>MAF3 | -0.7203 | 0.0046  | -0.1136 | 0.4163  | -0.0740 | 0.6786  |
| Glyma05G28140 | AGL9, SEP3           | 1.6856  | 0.0672  | 0.2853  | 0.4961  | -0.3462 | 0.1892  |
| Glyma05G29595 | AG                   | -1.5993 | 0.7770  | 0.7119  | 0.1476  | 0.3736  | 0.1379  |



|               |                        |         |        |         |        |         |        |
|---------------|------------------------|---------|--------|---------|--------|---------|--------|
| Glyma05G35820 | AGL29                  | NA      | NA     | 3.0974  | 0.1325 | -0.3487 | 1.0000 |
| Glyma06G02990 | AP3, ATAP3             | 1.1843  | 0.3381 | 0.1829  | 0.5857 | 0.0184  | 0.9298 |
| Glyma06G10020 | AGL22, SVP             | -1.0975 | 0.0000 | -0.9323 | 0.0000 | -0.5349 | 0.0153 |
| Glyma06G12380 | PI                     | -Inf    | 0.3303 | 0.5329  | 0.1205 | -0.2404 | 0.1033 |
| Glyma06G22650 | AGL8, FUL              | 1.0467  | 0.7784 | 0.2500  | 0.3758 | -0.0356 | 0.8195 |
| Glyma06G48270 | AGL11, STK             | NA      | NA     | 1.0565  | 1.0000 | -0.6807 | 0.0531 |
| Glyma07G03401 |                        | NA      | NA     | NA      | NA     | -1.9364 | 0.6394 |
| Glyma07G05001 | AGL62                  | NA      | NA     | Inf     | 0.2309 | 2.4683  | 0.3962 |
| Glyma07G05031 | AGL62                  | NA      | NA     | NA      | NA     | Inf     | 0.9911 |
| Glyma07G05061 | AGL62                  | NA      | NA     | NA      | NA     | -Inf    | 0.7563 |
| Glyma07G08831 | AGL20, SOC1,<br>ATSOC1 | -0.4926 | 0.0413 | 0.0512  | 0.6775 | -0.1097 | 0.5881 |
| Glyma07G08890 | AGL6                   | -0.3855 | 1.0000 | 0.3464  | 0.2411 | 0.1480  | 0.4155 |
| Glyma07G14363 | AGL44, ANR1            | 0.0727  | 1.0000 | -0.2431 | 0.5124 | -0.3081 | 0.4316 |
| Glyma07G30040 | AGL22, SVP             | -0.4373 | 0.8807 | -0.0365 | 0.7991 | 0.0765  | 0.7072 |
| Glyma07G35610 | AGL30                  | NA      | NA     | NA      | NA     | Inf     | 0.1763 |
| Glyma08G03820 | AGL91                  | -Inf    | 0.4849 | -Inf    | 0.9983 | 0.0919  | 1.0000 |
| Glyma08G03830 | AGL29                  | -1.5473 | 0.5094 | 0.0536  | 1.0000 | Inf     | 0.9911 |
| Glyma08G06991 | AGL11, STK             | -Inf    | 0.1522 | 0.5424  | 0.2158 | -0.3650 | 0.3530 |
| Glyma08G07001 | AGL21                  | 0.8119  | 0.5170 | -0.3461 | 0.4394 | 0.2421  | 0.5587 |
| Glyma08G07260 | AGL22, SVP             | -0.0243 | 0.9620 | -0.0124 | 0.8792 | -0.0661 | 0.6113 |
| Glyma08G10080 |                        | 1.6216  | 0.7439 | 1.4480  | 0.3199 | 0.3908  | 0.9644 |
| Glyma08G11110 | AGL3, SEP4             | -0.8101 | 0.0000 | -0.1376 | 0.3348 | 0.1961  | 0.1913 |
| Glyma08G11120 | AGL9, SEP3             | 2.5015  | 0.1158 | 2.1449  | 0.0114 | -0.2831 | 0.3798 |
| Glyma08G12730 | AG                     | -0.9778 | 1.0000 | 0.9970  | 0.0506 | 0.3442  | 0.1169 |
| Glyma08G27670 | AGL4, SEP2             | NA      | NA     | 0.4237  | 0.0461 | -0.3249 | 0.0189 |
| Glyma08G27680 | AGL8, FUL              | NA      | NA     | 0.2771  | 0.3564 | 0.0676  | 0.7696 |
| Glyma08G36380 | AGL7, AP1              | 0.6216  | 0.9820 | 0.3635  | 0.0867 | 0.1812  | 0.2658 |
| Glyma08G42300 | AGL1, SHP1             | -Inf    | 1.0000 | 0.5753  | 0.8484 | 0.2234  | 0.6020 |
| Glyma09G11551 | AGL38, PHE2            | -Inf    | 1.0000 | Inf     | 1.0000 | -Inf    | 1.0000 |
| Glyma09G27461 | AGL6                   | NA      | NA     | -0.6478 | 0.1394 | -0.2386 | 0.3928 |
| Glyma09G33451 | AGL21                  | -0.3891 | 0.4154 | 0.2776  | 0.5545 | -0.3267 | 0.4666 |
| Glyma09G36590 | AGL12, XAL1            | Inf     | 0.9928 | Inf     | 0.7065 | 1.4138  | 0.6964 |
| Glyma09G40230 | AGL20, SOC1            | -0.1103 | 0.5357 | 0.1058  | 0.2681 | -0.0433 | 0.7802 |

|               |                     |         |        |         |        |         |        |
|---------------|---------------------|---------|--------|---------|--------|---------|--------|
| Glyma09G40251 | AGL6                | NA      | NA     | NA      | NA     | 1.2737  | 0.4800 |
| Glyma09G42061 | ABS, AGL32,<br>TT16 | -Inf    | 0.7046 | NA      | NA     | -1.8982 | 0.4651 |
| Glyma10G10295 | AGL62               | 1.0558  | 0.6455 | 0.4249  | 0.5928 | -0.8246 | 0.4429 |
| Glyma10G11450 | AGL62               | NA      | NA     | Inf     | 1.0000 | NA      | NA     |
| Glyma10G38541 | AGL42               | 0.2470  | 0.9703 | -0.2871 | 0.8060 | -1.0187 | 0.5002 |
| Glyma10G38580 | AGL9, SEP3          | NA      | NA     | 0.5841  | 0.0394 | -0.2656 | 0.1271 |
| Glyma10G40060 | AGL62               | -Inf    | 0.7023 | -Inf    | 0.9983 | NA      | NA     |
| Glyma10G40070 | AGL62               | Inf     | 0.9928 | NA      | NA     | Inf     | 0.9911 |
| Glyma10G40080 | AGL62               | NA      | NA     | NA      | NA     | -Inf    | 1.0000 |
| Glyma11G03261 | AGL62               | 1.6420  | 0.7460 | NA      | NA     | NA      | NA     |
| Glyma11G07820 | AP3, ATAP3          | -0.5814 | 0.4607 | 0.5595  | 0.0009 | 0.1914  | 0.5035 |
| Glyma11G16105 | AGL15               | Inf     | 0.9928 | 0.2607  | 0.7146 | -0.2725 | 0.6943 |
| Glyma11G26260 | AGL80,<br>FEM111    | NA      | NA     | -Inf    | 0.9983 | NA      | NA     |
| Glyma11G30482 | AGL80,<br>FEM111    | -Inf    | 1.0000 | NA      | NA     | NA      | NA     |
| Glyma11G33460 | AGL80,<br>FEM111    | 0.1243  | 1.0000 | Inf     | 0.7065 | NA      | NA     |
| Glyma11G36890 | AGL9, SEP3          | 4.1221  | 0.0067 | 0.5488  | 0.2695 | -0.3005 | 0.2606 |
| Glyma12G00770 | AGL12, XAL1         | -0.8757 | 1.0000 | -1.8622 | 0.4511 | 0.2506  | 0.9501 |
| Glyma12G13560 | AP3, ATAP3          | NA      | NA     | NA      | NA     | -Inf    | 1.0000 |
| Glyma12G17721 | AGL15               | 0.3479  | 0.5696 | -0.0553 | 0.9880 | 0.0255  | 1.0000 |
| Glyma13G02170 | AGL104              | NA      | NA     | NA      | NA     | 2.8213  | 0.2615 |
| Glyma13G06730 | AGL4, SEP2          | -0.7237 | 0.4782 | 0.7038  | 0.0002 | 0.2084  | 0.2272 |
| Glyma13G06811 | AGL8, FUL           | 2.0994  | 0.5546 | 0.5996  | 0.0229 | -0.0776 | 0.7120 |
| Glyma13G07720 |                     | -0.0932 | 0.7580 | -0.0775 | 0.7312 | -0.0209 | 0.9224 |
| Glyma13G09660 | PI                  | Inf     | 0.9928 | 0.3544  | 0.2691 | 0.0585  | 0.7852 |
| Glyma13G29510 | AG                  | 1.0603  | 0.5484 | 0.8170  | 0.0089 | 0.2728  | 0.1464 |
| Glyma13G32810 | AGL21               | -0.2157 | 0.4717 | -0.2821 | 0.1694 | -0.6063 | 0.0015 |
| Glyma13G33031 | AGL22, SVP          | 0.6453  | 0.8138 | 0.3936  | 0.1764 | 0.2296  | 0.4122 |
| Glyma13G33051 | AGL22, SVP          | 0.2478  | 0.5135 | -0.3297 | 0.4691 | 0.1975  | 0.6425 |
| Glyma14G03100 | AGL5, SHP2          | 10.2290 | 0.0000 | 9.3020  | 0.0000 | 7.6001  | 0.0000 |
| Glyma14G24590 | PI                  | 0.3271  | 0.5177 | 0.3580  | 0.0413 | 0.0749  | 0.6415 |
| Glyma14G34160 | AGL104              | NA      | NA     | NA      | NA     | 1.6326  | 0.2632 |

|               |                       |         |        |         |        |         |        |
|---------------|-----------------------|---------|--------|---------|--------|---------|--------|
| Glyma14G36221 | AGL16                 | -0.2056 | 0.6147 | -0.1984 | 0.6989 | 0.5145  | 0.2039 |
| Glyma15G06302 | AGL22, SVP            | -0.3338 | 0.6678 | -0.2445 | 0.4487 | 0.5634  | 0.0467 |
| Glyma15G06314 | AGL22, SVP            | 0.0328  | 0.9351 | 0.1483  | 0.4884 | -0.0559 | 0.8159 |
| Glyma15G06470 | AGL44, ANR1           | NA      | NA     | 1.6357  | 0.7789 | 0.7583  | 0.6320 |
| Glyma15G09500 | AG                    | -0.8212 | 0.2399 | 0.1461  | 0.8522 | -0.2370 | 0.2239 |
| Glyma15G23335 |                       | 0.6710  | 0.3237 | -2.5343 | 0.5365 | -0.6104 | 0.8753 |
| Glyma15G23610 | AP3, ATAP3            | -1.5473 | 0.5094 | -0.4578 | 0.9962 | 0.0823  | 1.0000 |
| Glyma16G01541 | AGL62                 | 0.0222  | 1.0000 | 1.0507  | 1.0000 | 0.6641  | 0.9744 |
| Glyma16G13070 | AGL7, AP1             | 0.5214  | 0.7225 | 0.2736  | 0.0445 | -0.0417 | 0.7314 |
| Glyma16G17450 | AP3, ATAP3            | NA      | NA     | Inf     | 1.0000 | Inf     | 0.7164 |
| Glyma16G32540 | AGL6                  | -Inf    | 1.0000 | 0.3458  | 0.4618 | -0.3738 | 0.0903 |
| Glyma17G08861 | AGL3, SEP4            | -Inf    | 0.7023 | 0.4407  | 0.1883 | -0.1425 | 0.5368 |
| Glyma17G08890 | AGL8, FUL             | -0.5383 | 0.8647 | 0.0820  | 0.4702 | 0.0202  | 0.8693 |
| Glyma17G10941 | AGL65                 | -1.3036 | 0.2895 | 1.5128  | 0.5062 | 0.5956  | 0.8272 |
| Glyma17G14191 | AGL19, GL19           | -1.0822 | 0.0039 | -0.8091 | 0.0367 | -1.1492 | 0.2829 |
| Glyma18G00801 | AGL9, SEP3            | NA      | NA     | 0.6641  | 0.0664 | -0.3180 | 0.0298 |
| Glyma18G04760 | AGL80,<br>FEM111      | -1.3010 | 0.3993 | Inf     | 1.0000 | 0.3705  | 0.9602 |
| Glyma18G05963 | AGL80,<br>FEM111      | -Inf    | 0.7023 | 1.0565  | 1.0000 | NA      | NA     |
| Glyma18G05976 | AGL80,<br>FEM111      | NA      | NA     | NA      | NA     | Inf     | 0.9911 |
| Glyma18G06040 | AGL80,<br>FEM111      | -0.1700 | 1.0000 | 0.7472  | 0.5202 | -0.2358 | 0.8506 |
| Glyma18G12590 | AGL1, SHP1            | -Inf    | 0.7023 | Inf     | 1.0000 | 0.2984  | 0.5325 |
| Glyma18G33910 | AP3, ATAP3            | 2.6924  | 0.1214 | 1.9278  | 0.0368 | 3.5377  | 0.0052 |
| Glyma18G36263 | AP3, ATAP3            | Inf     | 0.9928 | NA      | NA     | NA      | NA     |
| Glyma18G45761 | AGL6                  | NA      | NA     | Inf     | 1.0000 | -0.7264 | 0.5776 |
| Glyma18G45780 | AGL20, SOC1<br>ATSOC1 | -0.1081 | 0.3017 | 0.1282  | 0.1430 | -0.1346 | 0.2294 |
| Glyma18G50900 | AGL4, SEP2            | 2.4264  | 0.4082 | 0.7034  | 0.0070 | 0.1493  | 0.4361 |
| Glyma18G50910 | AGL8, FUL             | -0.5734 | 0.2259 | -0.0824 | 0.7467 | 0.3363  | 0.2750 |
| Glyma19G04320 | AGL4, SEP2            | Inf     | 0.1370 | 0.4935  | 0.0188 | 0.0559  | 0.8244 |
| Glyma19G04326 | AGL10, CAL,<br>CAL1   | Inf     | 0.9928 | 0.1751  | 0.7200 | 0.4812  | 0.1763 |
| Glyma19G06145 |                       | -0.9778 | 1.0000 | 0.0211  | 1.0000 | -0.2776 | 1.0000 |

|               |                     |         |        |        |        |         |        |
|---------------|---------------------|---------|--------|--------|--------|---------|--------|
| Glyma19G06498 |                     | NA      | NA     | Inf    | 1.0000 | -0.0027 | 1.0000 |
| Glyma19G07162 |                     | Inf     | 0.9928 | NA     | NA     | 0.0836  | 1.0000 |
| Glyma20G00401 | ABS, AGL32,<br>TT16 | NA      | NA     | -Inf   | 0.9983 | -2.7236 | 0.3021 |
| Glyma20G04500 | AGL30               | NA      | NA     | NA     | NA     | 2.4126  | 0.0903 |
| Glyma20G27320 | AGL62               | Inf     | 0.9928 | NA     | NA     | NA      | NA     |
| Glyma20G27341 | AGL62               | -0.8757 | 1.0000 | -Inf   | 0.9983 | NA      | NA     |
| Glyma20G27361 | AGL61, DIA          | NA      | NA     | NA     | NA     | 1.0358  | 0.9812 |
| Glyma20G29250 | AGL9, SEP3          | NA      | NA     | 0.9264 | 0.0029 | 0.1626  | 0.3639 |
| Glyma20G29300 | AGL42               | Inf     | 0.4607 | 0.7421 | 0.1631 | -0.2370 | 0.7084 |

Data listed the ID of genes which significant regulated in *GmAGLI-OX* transgenic plants, their corresponding homologous genes of Arabidopsis, the  $\log_2$  Fold Change ( $\log_2FC$ ) and P value in VC, V4 and R1 period. NA indicate the gene is no expression. “Inf” indicate the gene express in transgenic plants but not in WT. “- Inf” indicate the gene express in WT but not in transgenic plants.

**Supporting Table 4. Transcripts associated with vernalization pathway.**

| Gene ID       | At       | VC      |         | V4      |         | R1      |         |
|---------------|----------|---------|---------|---------|---------|---------|---------|
|               | Ortholog | log2FC  | P value | log2FC  | P value | log2FC  | P value |
| Glyma01G11755 | VRN1     | NA      | NA      | NA      | NA      | NA      | NA      |
| Glyma04G43620 | VRN1     | -0.9459 | 0.2994  | -0.0548 | 0.8783  | -0.2036 | 0.5895  |
| Glyma07G19395 | VRN1     | NA      | NA      | NA      | NA      | -Inf    | 0.2865  |
| Glyma07G21160 | VRN1     | 0.1430  | 0.2492  | -0.1998 | 0.0974  | -0.0516 | 0.7163  |
| Glyma08G44640 | VRN1     | -0.6487 | 0.7482  | 0.3242  | 0.8800  | 0.3269  | 0.7126  |
| Glyma08G44655 | VRN1     | NA      | NA      | NA      | NA      | NA      | NA      |
| Glyma09G18790 | VRN1     | 0.7825  | 0.7996  | 0.1536  | 0.6819  | -0.5633 | 0.1652  |
| Glyma09G20150 | VRN1     | NA      | NA      | - Inf   | 0.7018  | NA      | NA      |
| Glyma09G20281 | VRN1     | 0.1834  | 0.9622  | 1.6386  | 0.5092  | 0.6899  | 0.5476  |
| Glyma10G42762 | VRN1     | NA      | NA      | NA      | NA      | NA      | NA      |
| Glyma10G42774 | VRN1     | 0.0467  | 1.0000  | -0.0693 | 1.0000  | 1.0823  | 0.7924  |
| Glyma10G42787 | VRN1     | -0.3650 | 1.0000  | 0.0507  | 1.0000  | 2.0167  | 0.5926  |
| Glyma11G13210 | VRN1     | 0.0928  | 0.5273  | 0.0480  | 0.6932  | 0.0100  | 0.9224  |
| Glyma11G13220 | VRN1     | -0.2407 | 0.4845  | 0.9905  | 0.2928  | 0.3736  | 0.3895  |
| Glyma11G13231 | VRN1     | 0.9947  | 0.7980  | - Inf   | 0.9983  | 0.3872  | 0.5349  |
| Glyma12G05250 | VRN1     | 0.2090  | 0.2392  | 0.0133  | 0.9532  | -0.0375 | 0.7917  |
| Glyma14G08641 | VRN1     | -0.0504 | 0.7690  | 0.0371  | 0.8197  | -0.0712 | 0.6620  |
| Glyma16G05110 | VRN1     | 0.2499  | 0.8561  | 0.2182  | 0.6264  | -0.4615 | 0.2948  |
| Glyma18G30790 | VRN1     | -0.1303 | 0.9082  | 0.2447  | 0.4181  | -0.0215 | 0.9508  |
| Glyma19G27955 | VRN1     | NA      | NA      | NA      | NA      | NA      | NA      |
| Glyma20G01130 | VRN1     | -0.0632 | 0.5851  | 0.0156  | 0.9021  | 0.0287  | 0.8314  |
| Glyma20G24211 | VRN1     | NA      | NA      | NA      | NA      | Inf     | 0.9911  |
| Glyma20G24222 | VRN1     | Inf     | 0.9928  | - Inf   | 0.9983  | -1.9081 | 0.6416  |
| Glyma20G24244 | VRN1     | NA      | NA      | NA      | NA      | NA      | NA      |
| Glyma20G24268 | VRN1     | NA      | NA      | Inf     | 1.0000  | NA      | NA      |
| Glyma19G41287 | VRN2     | -0.5288 | 0.5719  | 0.0229  | 1.0000  | -0.0672 | 0.9713  |
| Glyma05G35280 | VRN5     | 0.0372  | 0.7162  | -0.1470 | 0.2268  | -0.0558 | 0.6581  |
| Glyma07G09800 | VRN5     | -0.2154 | 0.0824  | -0.2517 | 0.0131  | 0.1534  | 0.2249  |
| Glyma08G04440 | VRN5     | -0.0416 | 0.7989  | -0.0561 | 0.7573  | 0.0337  | 0.8074  |

|               |      |         |        |         |        |         |        |
|---------------|------|---------|--------|---------|--------|---------|--------|
| Glyma09G32010 | VRN5 | -0.0431 | 0.6496 | -0.0191 | 0.8566 | 0.0958  | 0.4370 |
| Glyma10G40631 | RTV1 | NA      | NA     | - Inf   | 0.9983 | 1.4645  | 0.6397 |
| Glyma02G37880 | VEL1 | 0.0625  | 0.6004 | 0.1434  | 0.2632 | 0.0874  | 0.5631 |
| Glyma13G00920 | VEL1 | -0.0899 | 0.2567 | -0.2379 | 0.0226 | 0.0520  | 0.6837 |
| Glyma14G36100 | VEL1 | 0.0859  | 0.5300 | 0.0249  | 0.8900 | 0.1221  | 0.4715 |
| Glyma17G07000 | VEL1 | -0.0221 | 0.7704 | -0.2133 | 0.0374 | 0.1521  | 0.2299 |
| Glyma08G21490 | ELF7 | 0.1212  | 0.1827 | -0.0189 | 0.8632 | -0.0866 | 0.4823 |
| Glyma07G01830 | ELF7 | 0.0174  | 0.8689 | -0.0003 | 1.0000 | 0.0525  | 0.6905 |
| Glyma09G07980 | ELF8 | -0.0057 | 0.9431 | -0.1478 | 0.1221 | -0.2829 | 0.0130 |
| Glyma15G19450 | ELF8 | -0.0196 | 0.8607 | -0.1003 | 0.3266 | -0.1732 | 0.1542 |
| Glyma13G31033 | FES1 | 0.0686  | 0.5813 | -0.1367 | 0.2324 | 0.0010  | 0.9802 |
| Glyma15G08331 | FES1 | 0.1624  | 0.1983 | -0.0171 | 0.9064 | -0.1925 | 0.1834 |

Data listed the ID of genes which significant regulated ( $P < 0.05$ ) in *GmAGL1*-OX transgenic plants, with their corresponding homologous genes of Arabidopsis, the  $\log_2$  Fold Change ( $\log_2FC$ ) and P value in VC, V4 and R1 period. NA indicate the gene is no expression. “Inf” indicate the gene express in transgenic plants but not in WT. “- Inf” indicate the gene express in WT but not in transgenic plants.

**Supporting Table 5. Transcripts associated with the autonomous pathway**

| Gene ID       | At<br>Ortholog | VC      |         | V4      |         | R1      |         |
|---------------|----------------|---------|---------|---------|---------|---------|---------|
|               |                | log2FC  | P value | log2FC  | P value | log2FC  | P value |
| Glyma02G29380 | PIE1           | -0.1383 | 0.1786  | 0.0716  | 0.4848  | -0.1538 | 0.2157  |
| Glyma05G24002 | PIE1           | 1.3584  | 0.6102  | 1.5879  | 0.1900  | 0.3180  | 0.9604  |
| Glyma09G17220 | PIE1           | -0.0113 | 0.9165  | -0.0527 | 0.5771  | -0.1622 | 0.1659  |
| Glyma04G38071 | FRI            | -0.1181 | 0.3081  | -0.0814 | 0.5326  | 0.0960  | 0.5066  |
| Glyma06G17005 | FRI            | 0.1806  | 0.1124  | -0.1190 | 0.3431  | -0.0285 | 0.8569  |
| Glyma01G07320 | FIP1           | NA      | NA      | NA      | NA      | NA      | NA      |
| Glyma09G08090 | FIP1           | 0.0122  | 0.9690  | 0.1399  | 0.3983  | 0.0641  | 0.7220  |
| Glyma15G19570 | FIP1           | -0.0621 | 0.6363  | -0.0316 | 0.7982  | 0.0166  | 0.9116  |
| Glyma16G28370 | VIP1           | 0.0023  | 1.0000  | 0.1421  | 0.6526  | 0.2552  | 0.2426  |
| Glyma16G28385 | VIP1           | 0.0699  | 1.0000  | NA      | NA      | 1.1311  | 0.9810  |
| Glyma02G09140 | VIP1           | -0.1191 | 0.4206  | 0.1050  | 0.5664  | -0.0013 | 0.9970  |
| Glyma02G09147 | VIP1           | NA      | NA      | NA      | NA      | Inf     | 0.9911  |
| Glyma02G09162 | VIP1           | Inf     | 0.9928  | NA      | NA      | NA      | NA      |
| Glyma13G16700 | VIP3           | -0.0103 | 0.9529  | -0.1893 | 0.1749  | 0.0186  | 0.9126  |
| Glyma17G05990 | VIP3           | 0.0416  | 0.6114  | -0.0977 | 0.3337  | 0.0857  | 0.5027  |
| Glyma04G32540 | VIP4           | -0.0392 | 0.6264  | -0.0830 | 0.3657  | -0.0046 | 0.9937  |
| Glyma07G31365 | VIP5           | 0.0707  | 0.5067  | -0.0429 | 0.7109  | 0.0904  | 0.4760  |
| Glyma13G05760 | VIP5           | -0.2021 | 0.3518  | -0.1112 | 0.5077  | -0.1909 | 0.2853  |
| Glyma13G25093 | VIP5           | 0.1061  | 0.3004  | -0.0728 | 0.4962  | 0.0665  | 0.5724  |
| Glyma19G35350 | VIP5           | 0.6090  | 0.4348  | -0.1741 | 0.7426  | -0.0448 | 0.9750  |
| Glyma03G32600 | VIP5           | 0.0263  | 1.0000  | -0.1748 | 0.6489  | 0.0045  | 1.0000  |
| Glyma03G38980 | VIP5           | -0.9301 | 1.0000  | NA      | NA      | -0.8064 | 0.4411  |
| Glyma05G25030 | FCA            | 1.1408  | 0.2990  | NA      | NA      | Inf     | 0.9911  |
| Glyma07G36630 | FCA            | 0.0503  | 0.5363  | -0.2567 | 0.0086  | 0.0723  | 0.5230  |
| Glyma03G37950 | FCA            | 0.0984  | 0.5225  | 0.1299  | 0.3296  | -0.0690 | 0.6653  |
| Glyma17G03960 | FCA            | 0.0457  | 0.6521  | -0.0256 | 0.8091  | -0.1296 | 0.2807  |
| Glyma19G40570 | FCA            | -0.0397 | 0.7856  | 0.0501  | 0.6967  | -0.2017 | 0.2102  |
| Glyma13G26820 | FY             | 0.1168  | 0.2167  | -0.1146 | 0.3080  | -0.1146 | 0.3080  |
| Glyma15G37830 | FY             | 0.1251  | 0.3003  | -0.1555 | 0.2200  | -0.1555 | 0.2200  |



|               |     |         |        |         |        |         |        |
|---------------|-----|---------|--------|---------|--------|---------|--------|
| Glyma02G18610 | FLD | 0.2008  | 0.0701 | 0.0533  | 0.6613 | 0.0150  | 0.8936 |
| Glyma09G07120 | FVE | 0.0701  | 0.3032 | -0.0406 | 0.6262 | -0.0808 | 0.4319 |
| Glyma13G42660 | FVE | 0.1515  | 0.2636 | -0.1980 | 0.0840 | 0.0324  | 0.8217 |
| Glyma15G02770 | FVE | -0.4874 | 0.0100 | -0.1592 | 0.4072 | 0.3160  | 0.0788 |
| Glyma15G18450 | FVE | -0.0372 | 0.6094 | 0.0049  | 0.9496 | -0.0574 | 0.5893 |
| Glyma03G36970 | LD  | -0.0633 | 0.6401 | -0.1700 | 0.1494 | -0.1204 | 0.4037 |
| Glyma19G39620 | LD  | -0.0453 | 0.7177 | -0.0804 | 0.4977 | -0.0379 | 0.8190 |
| Glyma13G42061 | FPA | -0.0880 | 0.4763 | 0.2375  | 0.0405 | -0.1973 | 0.2367 |
| Glyma15G03335 | FPA | -0.0487 | 0.7361 | 0.1762  | 0.1026 | -0.0187 | 0.9142 |
| Glyma11G13490 | FPA | 0.0398  | 0.6786 | 0.1535  | 0.1384 | -0.2889 | 0.0156 |
| Glyma12G05490 | FPA | 0.1759  | 0.3326 | 0.0331  | 0.9255 | 0.1286  | 0.5595 |

Data listed the ID of genes which significant regulated ( $P < 0.05$ ) in *GmAGL1*-OX transgenic plants, with their corresponding homologous genes of Arabidopsis, the  $\log_2$  Fold Change ( $\log_2FC$ ) and P value in VC, V4 and R1 period. NA indicate the gene is no expression. “Inf” indicate the gene express in transgenic plants but not in WT. “- Inf” indicate the gene express in WT but not in transgenic plants.

**Supporting Table 6. Transcripts associated with the GA pathway.**

| Gene ID       | At       | VC                  |         | V4                  |         | R1                  |         |
|---------------|----------|---------------------|---------|---------------------|---------|---------------------|---------|
|               | Ortholog | log <sub>2</sub> FC | P value | log <sub>2</sub> FC | P value | log <sub>2</sub> FC | P value |
| Glyma20G34260 | GAI      | 0.3220              | 0.2788  | 0.4578              | 0.0109  | 0.2174              | 0.2580  |
| Glyma04G21340 | GAI      | 0.2739              | 0.0311  | 0.2371              | 0.1689  | -0.0725             | 0.7428  |
| Glyma10G02790 | GID1B    | -0.0432             | 0.8442  | 0.7690              | 0.0000  | 0.0788              | 0.5445  |
| Glyma19G33381 | GID1B    | -0.0010             | 1.0000  | 0.1388              | 0.3733  | 0.1136              | 0.5475  |
| Glyma02G17010 | GID1B    | 0.1418              | 0.5515  | 0.7078              | 0.0000  | 0.0242              | 0.8888  |
| Glyma03G30460 | GID1B    | 0.1922              | 0.4790  | 0.7690              | 0.0000  | -0.3216             | 0.1668  |
| Glyma10G29910 | GID1C    | -0.0888             | 0.3798  | 0.1326              | 0.1773  | 0.1384              | 0.2380  |
| Glyma13G25900 | GID1C    | -0.2016             | 0.2554  | -0.2217             | 0.3891  | 0.0188              | 0.9890  |
| Glyma20G37430 | GID1C    | -0.2243             | 0.0660  | 0.3362              | 0.0006  | -0.1233             | 0.4315  |
| Glyma06G47000 | MYB65    | 0.0138              | 1.0000  | -0.1940             | 0.6230  | 0.0928              | 0.8370  |
| Glyma02G01530 | RGA1     | 0.0254              | 0.7653  | -0.2316             | 0.0155  | Inf                 | 0.9911  |
| Glyma05G27190 | RGA1     | 0.1503              | 0.2604  | 0.2274              | 0.1219  | 0.2599              | 0.0690  |
| Glyma06G23940 | RGA1     | -0.1008             | 0.1954  | -0.2952             | 0.0027  | -0.2817             | 0.0825  |
| Glyma08G10140 | RGA1     | 0.1218              | 0.5841  | 0.0800              | 0.6504  | -0.1287             | 0.2631  |
| Glyma10G33380 | RGA1     | 0.0254              | 0.7653  | -0.2316             | 0.0155  | -0.1595             | 0.3225  |
| Glyma05G03020 | RGL1     | -0.0538             | 0.8779  | 2.3421              | 0.0033  | 0.1072              | 0.8558  |
| Glyma08G25800 | RGL1     | Inf                 | 0.9928  | NA                  | NA      | - Inf               | 1.0000  |
| Glyma17G13680 | RGL1     | Inf                 | 0.4571  | 1.5743              | 0.5077  | -0.2458             | 0.8170  |
| Glyma18G43580 | RGL1     | NA                  | NA      | NA                  | NA      | -2.7274             | 0.0000  |
| Glyma19G40440 | RGL1     | -1.9032             | 0.5875  | 0.9278              | 1.0000  | 0.0358              | 1.0000  |
| Glyma09G04110 | RGL2     | 1.0222              | 0.9863  | -1.3524             | 0.2517  | 0.8573              | 0.4814  |
| Glyma10G01571 | RGL2     | Inf                 | 0.6853  | -0.6164             | 0.9967  | -0.4930             | 1.0000  |
| Glyma11G33720 | RGL2     | 0.0763              | 0.2966  | 0.0976              | 0.2588  | 0.0574              | 0.5757  |
| Glyma15G15110 | RGL2     | -0.9397             | 0.8179  | 2.1602              | 0.2370  | 0.1898              | 0.9321  |
| Glyma18G04500 | RGL2     | -0.0192             | 0.7865  | 0.0485              | 0.5880  | 0.0383              | 0.6958  |
| Glyma03G37851 | RGL3     | -1.4893             | 0.0443  | 0.0565              | 1.0000  | - Inf               | 1.0000  |

Data listed the ID of genes which significant regulated ( $P < 0.05$ ) in *GmAGL1*-OX transgenic plants, with their corresponding homologous genes of Arabidopsis, the log<sub>2</sub> Fold Change (log<sub>2</sub>FC) and P value in VC, V4 and R1 period. NA indicate the gene is no expression. “Inf” indicate the gene express in transgenic plants but not in WT. “- Inf” indicate the gene express in WT but not in transgenic plants.
