# Supplementary material for: Soybean MADS-box gene GmAGL1 promotes flowering via the photoperiod pathway
Source: PubMed Central journal article supplement (PMC5769455; doi:10.1186/s12864-017-4402-2), 2018-01-16

WT

Transgenic

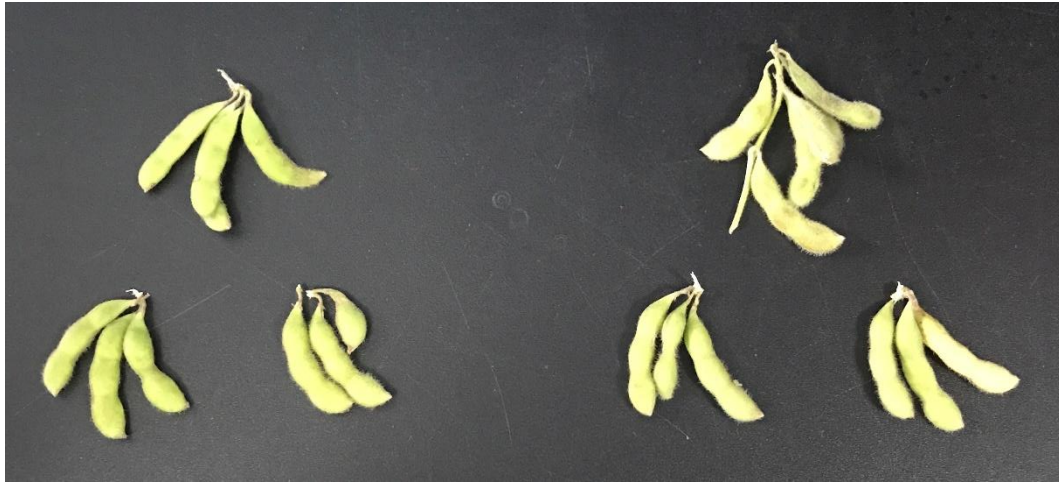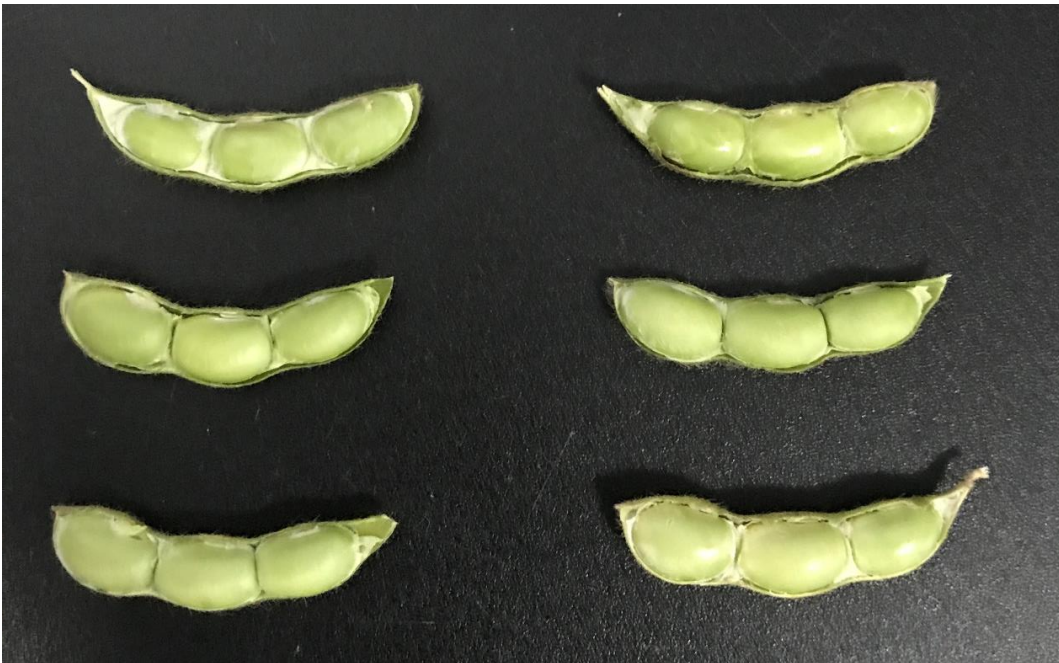

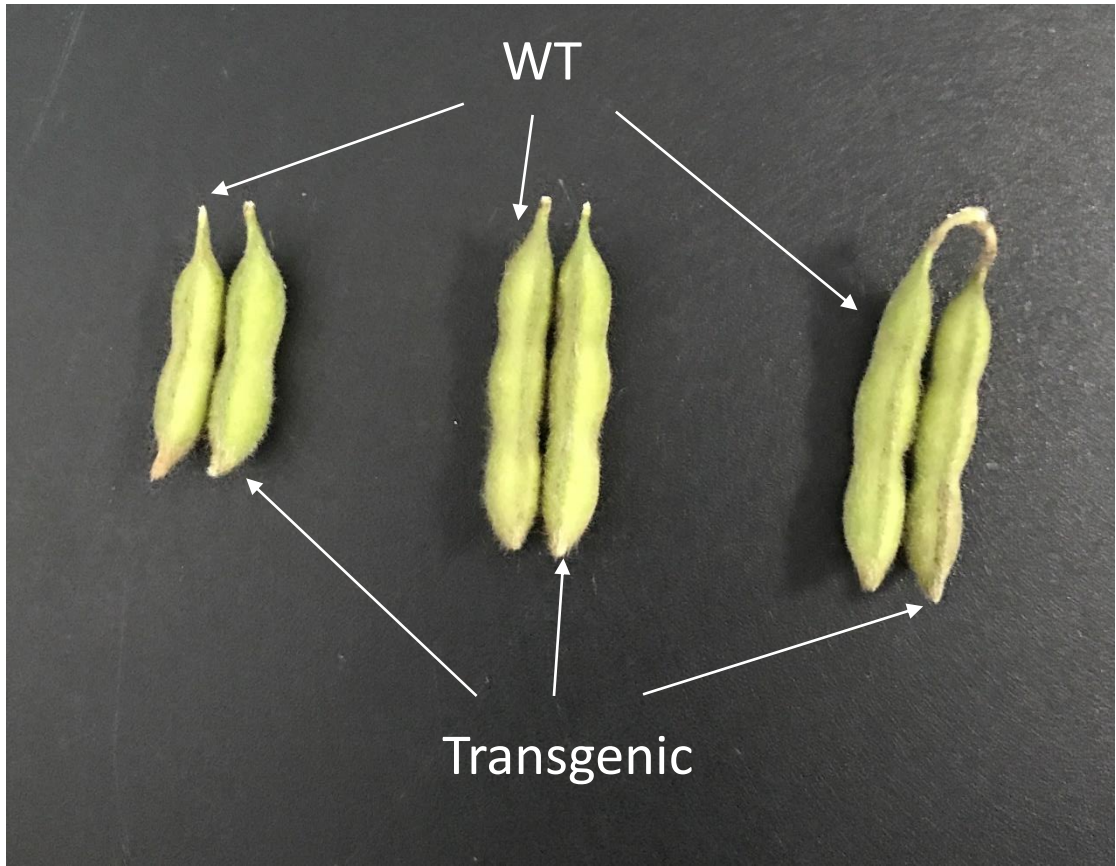

Supplement: 12864_2017_4402_MOESM3_ESM.pdf [file 12864_2017_4402_MOESM3_ESM.pdf]
