# Supplementary material for: Soybean MADS-box gene GmAGL1 promotes flowering via the photoperiod pathway
Source: PubMed Central journal article supplement (PMC5769455; doi:10.1186/s12864-017-4402-2), 2018-01-16

## Experimental process of GmAGL1 transformation

- Method: Agrobacterium - mediated cotyledon method
- Marker gene: cp4-EPSPS
- Screening agent: glyphosate 5-10mg / L
- Plant Material: Jack

### Experimental steps

- 1、 Selected soybean seeds

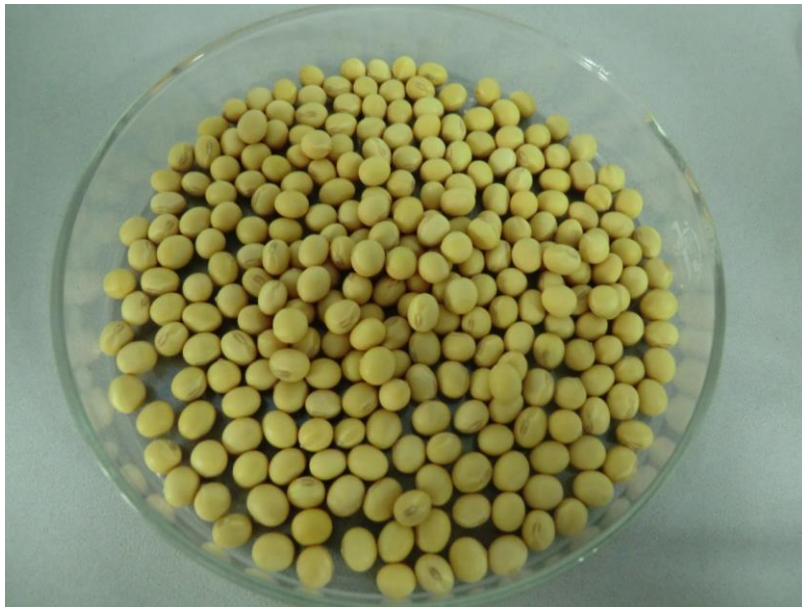

- 2、 Seeds disinfection

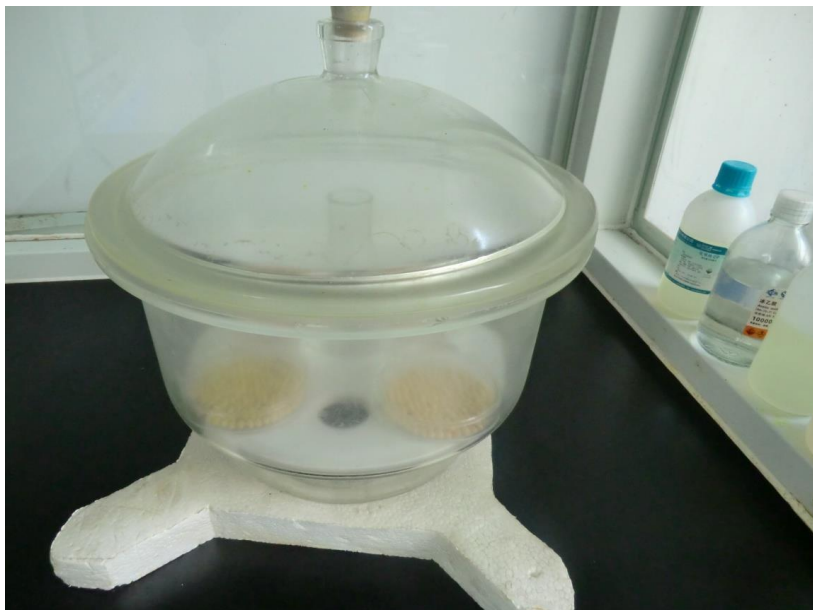

### 3、 Seeds germination

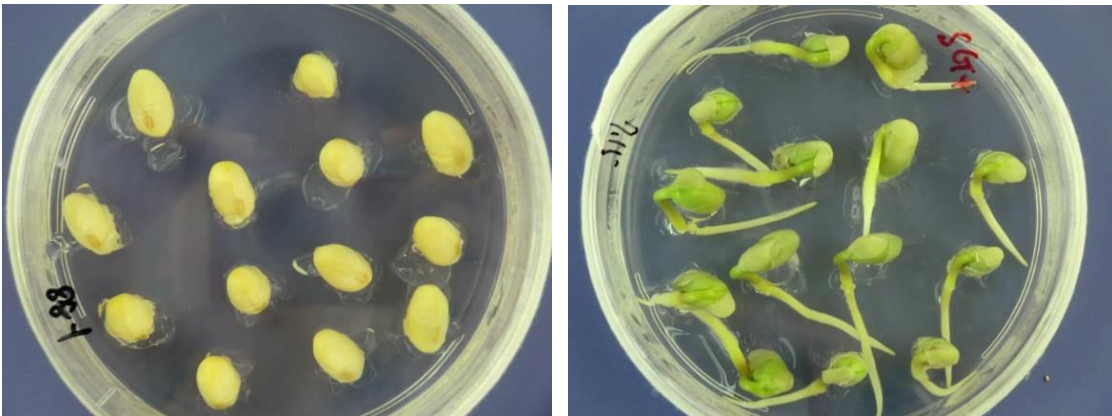

### 4、 Agrobacterium infection of soybean cotyledon

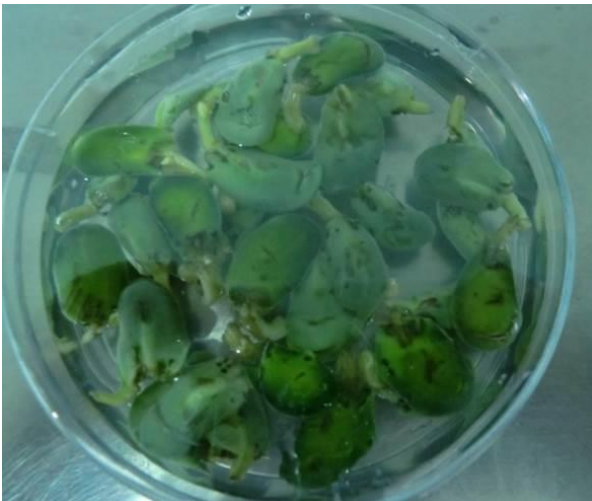

### 5、 Agrobacterium and soybean explants co-culture

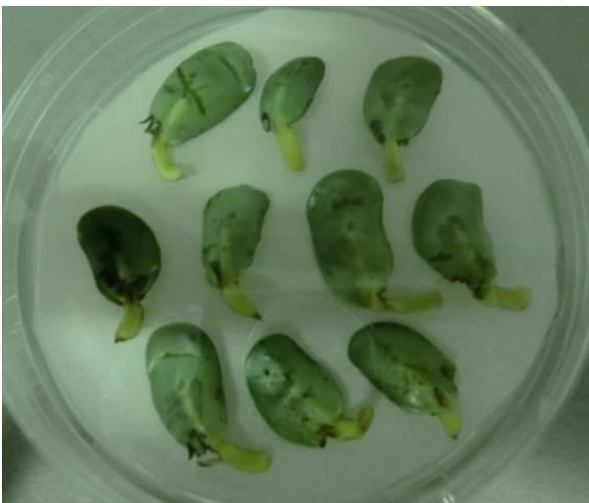

## 6、 Shoots induction

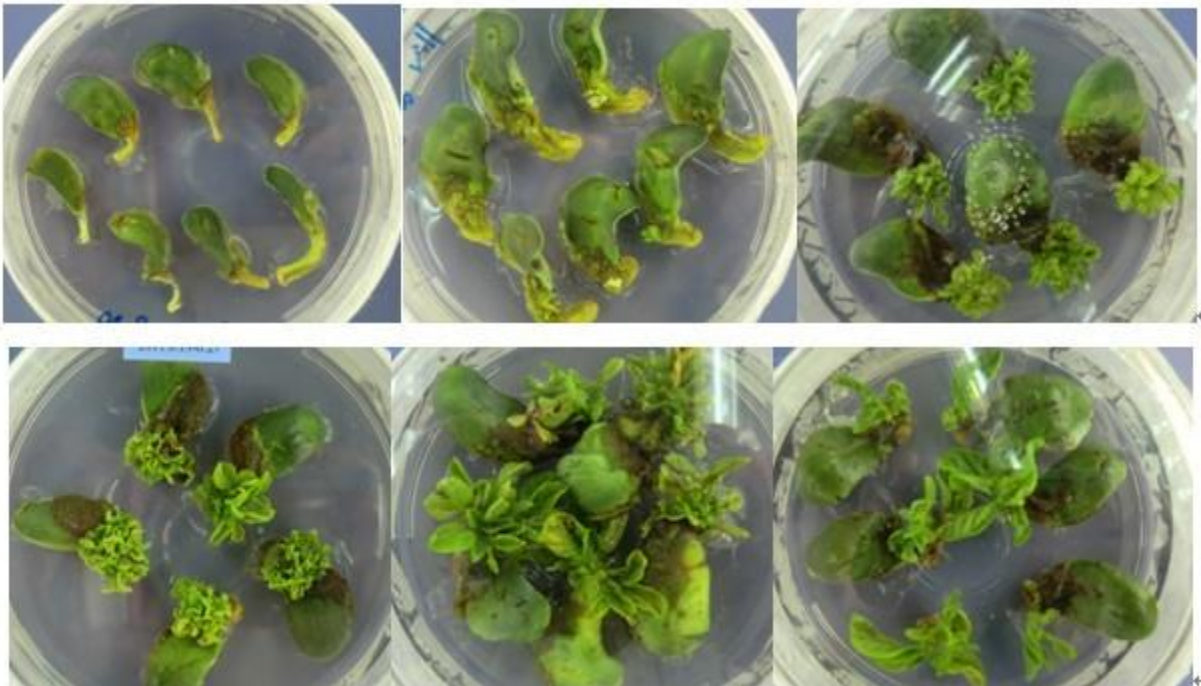

## 7、 Shoots elongation

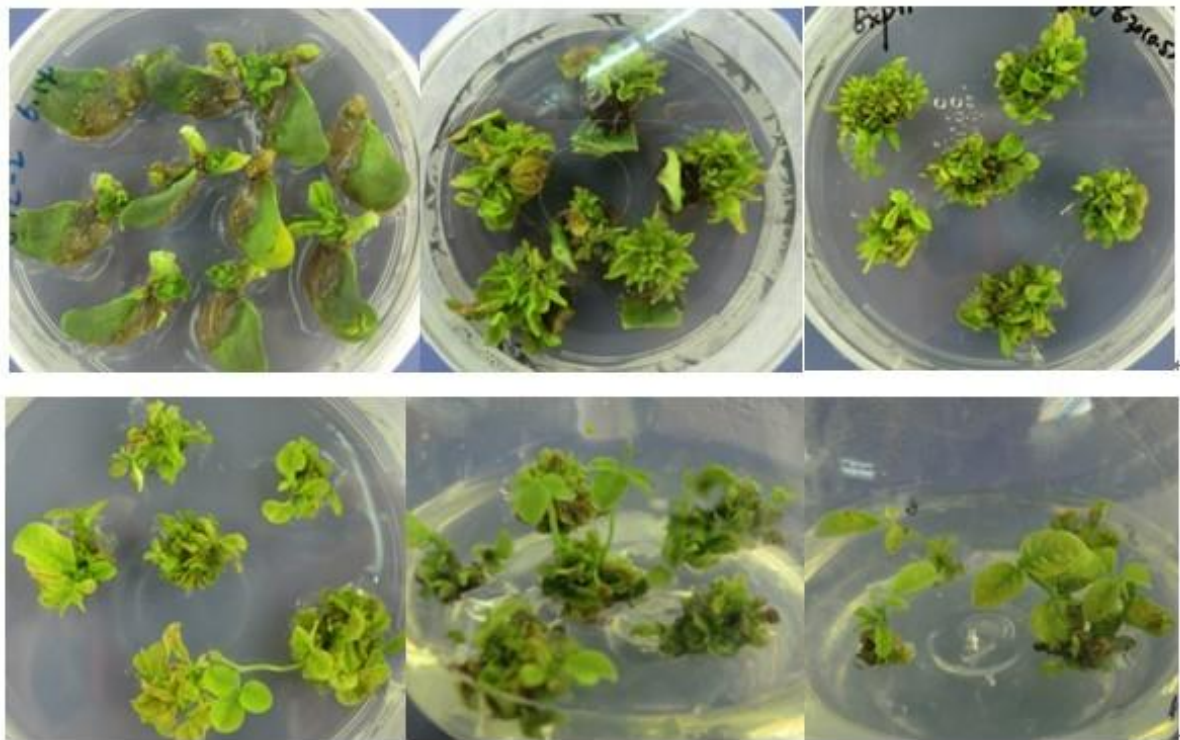



8、 Tissue culture seedlings rooting

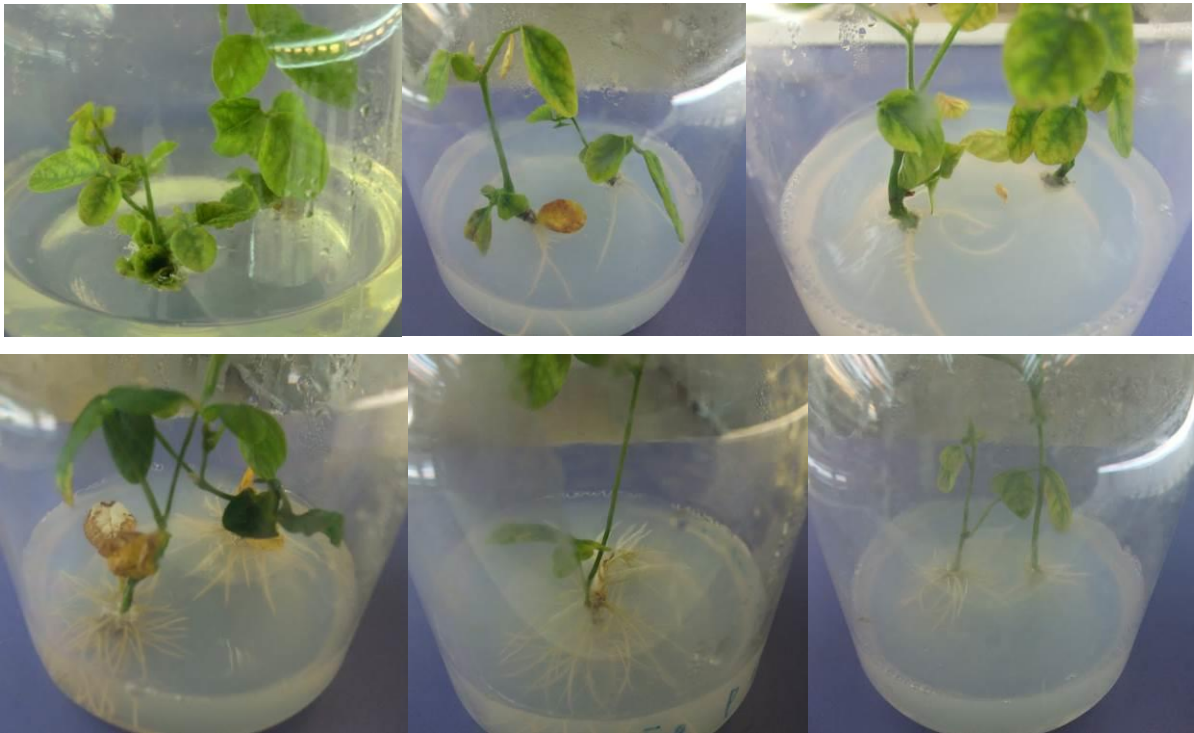

9、 Tissue culture plants indoor transplantation

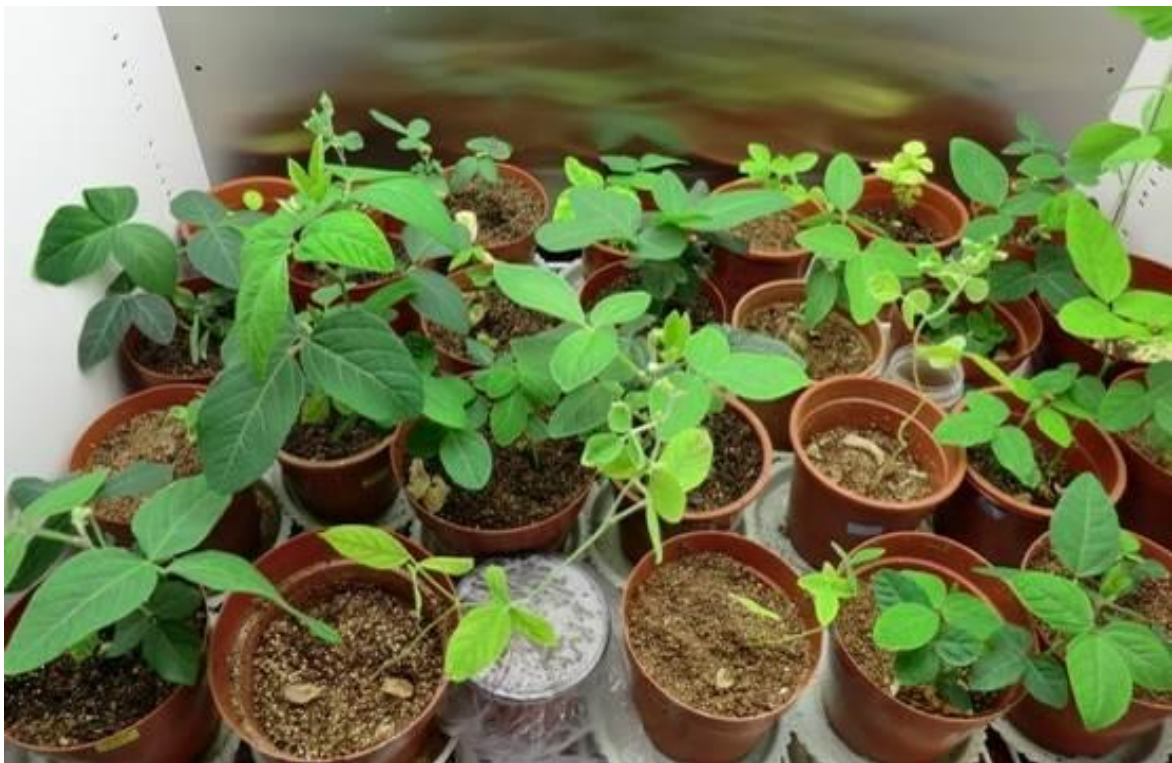

10、 Pods of transgenic plants

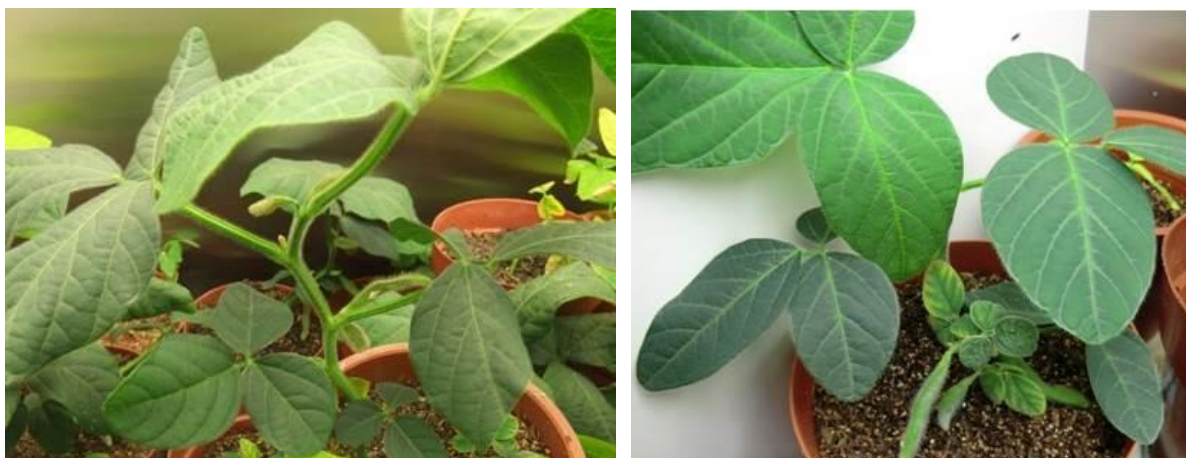

11、 Detection of T0 generation transgenic plants

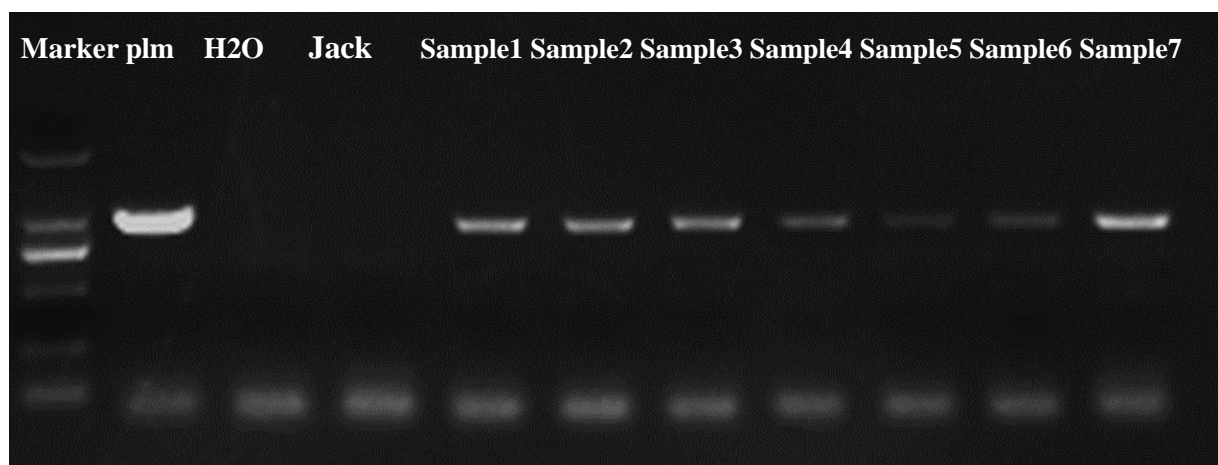

Supplement: 12864_2017_4402_MOESM4_ESM.pdf [file 12864_2017_4402_MOESM4_ESM.pdf]
